# Supplementary material for: A new model isolates glioblastoma clonal interactions and reveals unexpected modes for regulating motility, proliferation, and drug resistance
Source: PubMed Central journal article supplement (PMC6874607; doi:10.1038/s41598-019-53850-7), 2019-11-22
Supplement: 41598_2019_53850_MOESM1_ESM.pdf [file 41598_2019_53850_MOESM1_ESM.pdf]

**A new model isolates glioblastoma clonal interactions and reveals unexpected modes for regulating motility, proliferation, and drug resistance**

**Justin B Davis<sup>1</sup>, Sreshta S Krishna<sup>1</sup>, Ryan Abi Jomaa<sup>1</sup>, Cindy Duong<sup>1</sup>, Virginia Espina<sup>1</sup>, Lance A Liotta<sup>1</sup>, Claudius Mueller<sup>1\*</sup>**

<sup>1</sup>Center for Applied Proteomics and Molecular Medicine, George Mason University, 10920 George Mason Circle, Manassas, VA 20110, USA

Supplemental Figure 1. A-D Highest and lowest (phospho)protein abundance quartiles for U87MG cell line clonal subtypes 2, 3, 4, and 6. Protein-protein interactions as predicted by STRING were plotted using Gephi, with radial arms representing separate protein interaction clusters and color shade corresponding to protein abundance level (proteins described by gene names as understood by STRING, dark red=high, dark blue=low).

A. Subtype 2  
(Clones: S, U, V, W)

high  
protein level/phosphorylation

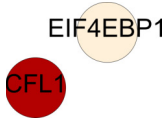

low  
protein level/phosphorylation

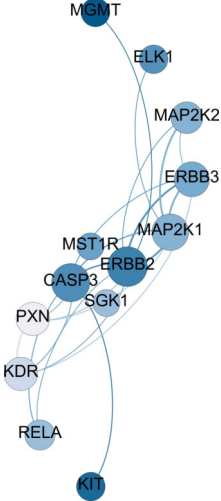

B.

# Subtype 3 (Clones: H, K, M)

high  
protein level/phosphorylation

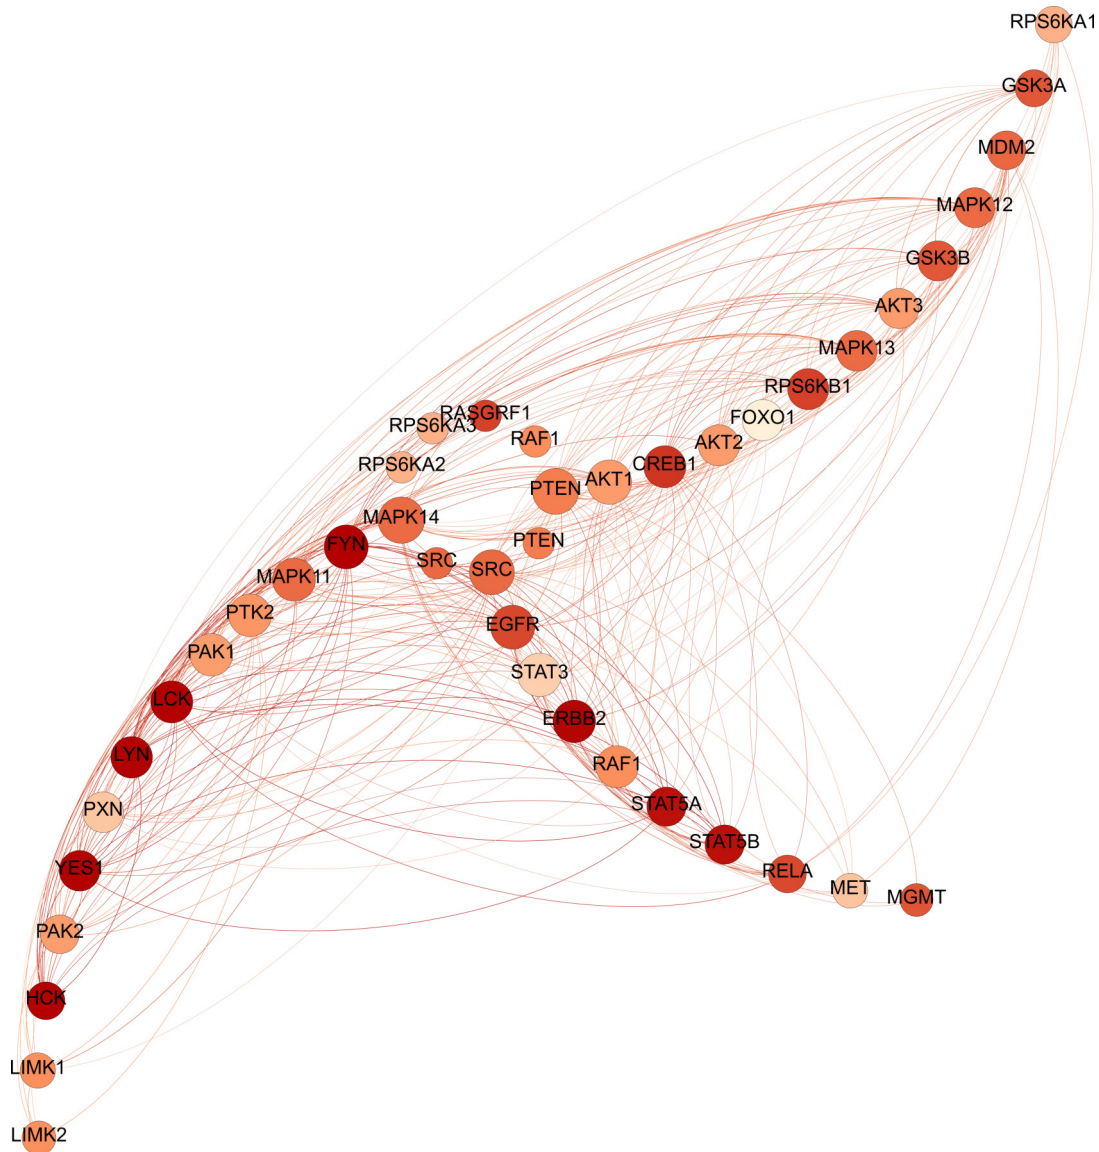

low  
protein level/phosphorylation

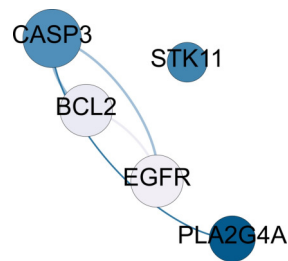

C.

# Subtype 4 (Clones: F, G)

high  
protein level/phosphorylation

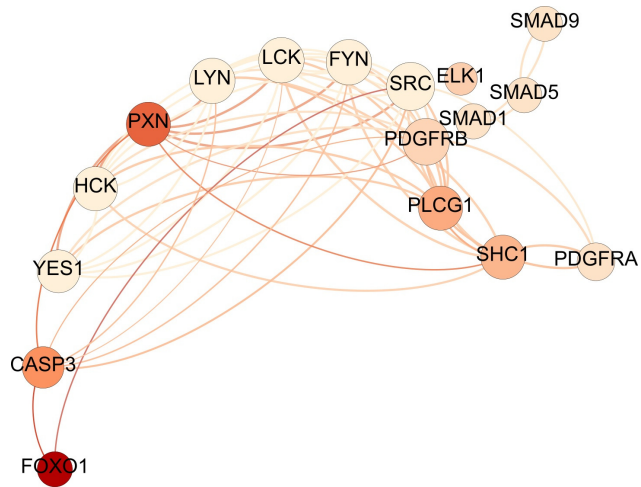

low  
protein level/phosphorylation

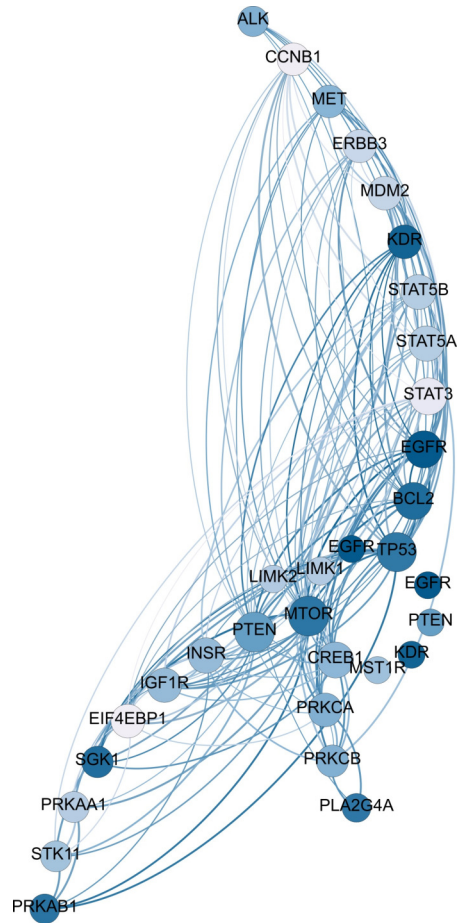

D.

# Subtype 6 (Clones: P, R)

high  
protein level/phosphorylation

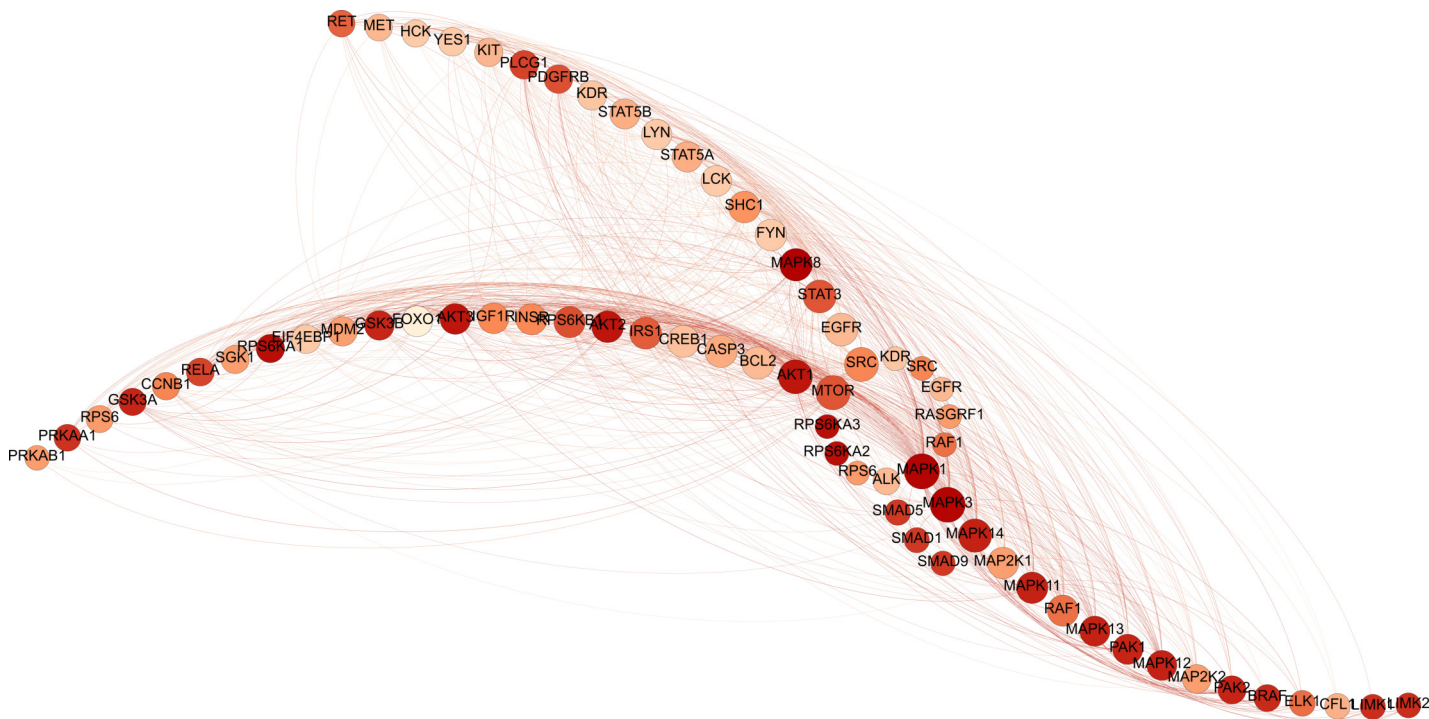

low  
protein level/phosphorylation

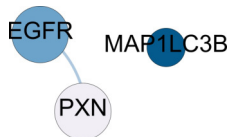

**Supplemental Figure 2. Treatment response of clones C and E to cisplatin and docetaxel. To be able to assess clonal interactions at the critical transition from cytostatic to cytotoxic treatment response, we calculated the actual “growth rate” (cell doublings/day =  $\log_2(\text{CellCount}_{\text{final}}/\text{CellCount}_{\text{original}})/6$  days) (A, B). This is in contrast to the often used “% cell survival”, which does not allow differentiation of cytotoxic and cytostatic response (C, D). Drug concentrations closest to the cytostatic/cytotoxic response transition for at least one of the measured clones were chosen for further analysis.**

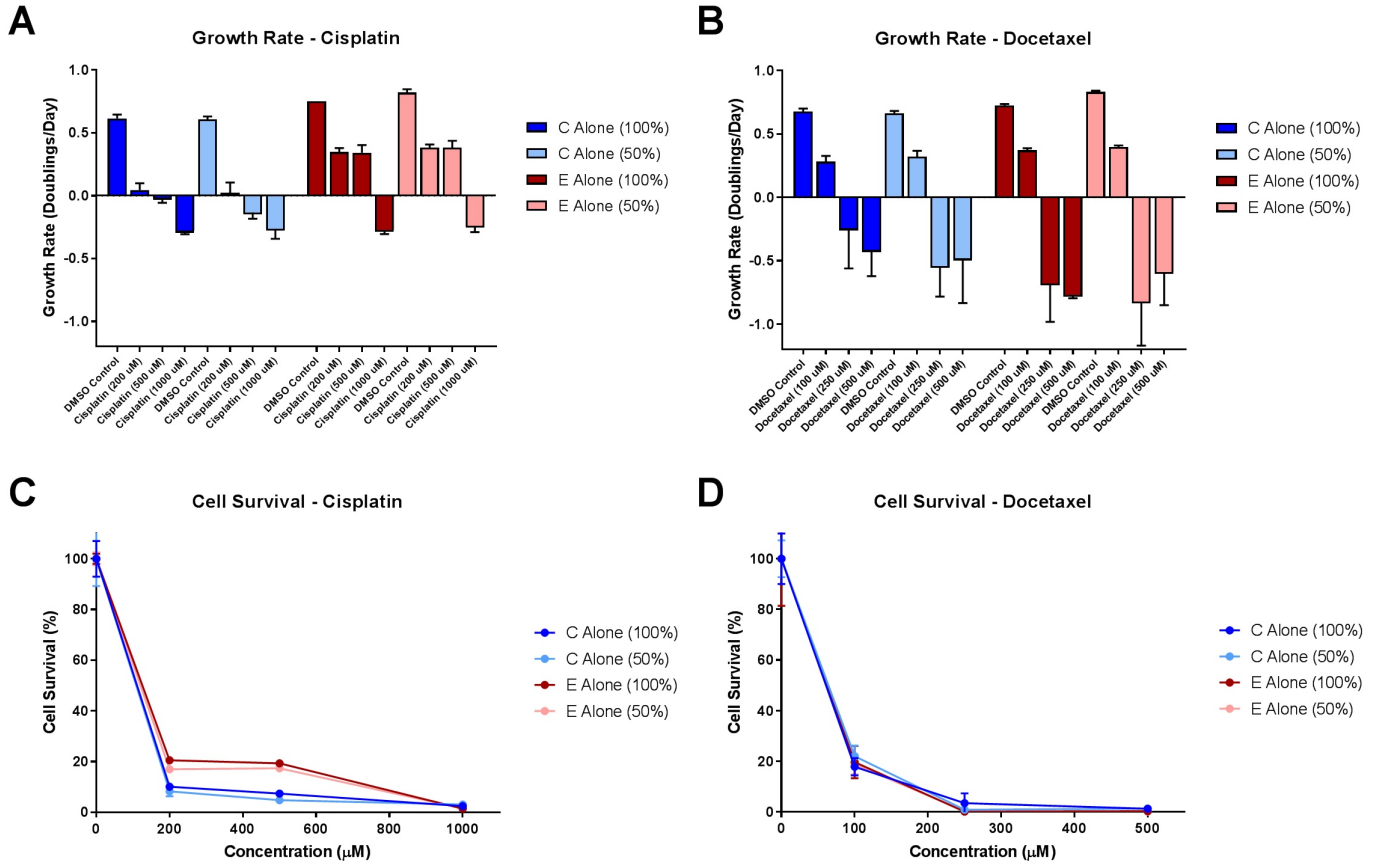

**Supplemental Table 1: Antibodies used for reverse phase protein microarray analysis.**

| <b>Antibody</b>                           | <b>Vendor &amp; Catalog Number</b> | <b>Dilution</b> |
|-------------------------------------------|------------------------------------|-----------------|
| 4E-BP1 Ser65                              | Cell Signaling Technology #9451    | 1:50            |
| Akt Ser473                                | Cell Signaling Technology #9271    | 1:100           |
| Akt Thr308                                | Cell Signaling Technology #9275    | 1:100           |
| ALK Tyr1586                               | Cell Signaling Technology #3348    | 1:200           |
| AMPK $\alpha$ 1 Ser485                    | Cell Signaling Technology #4184    | 1:50            |
| AMPK $\beta$ 1 Ser108                     | Cell Signaling Technology #4181    | 1:50            |
| B-Raf Ser445                              | Cell Signaling Technology #2696    | 1:50            |
| Bcl2 Ser70                                | Cell Signaling Technology #2827    | 1:50            |
| cKit Tyr703                               | Cell Signaling Technology #3073    | 1:50            |
| Cleaved Caspase 3 Asp175                  | Cell Signaling Technology #9661    | 1:50            |
| Cleaved PARP Asp214                       | Cell Signaling Technology #9541    | 1:100           |
| cMet                                      | Abcam #ab51067                     | 1:200           |
| Cofilin Ser3                              | Cell Signaling Technology #3313    | 1:100           |
| cPLA2 Ser505                              | Cell Signaling Technology #2831    | 1:1000          |
| cRAF Ser338                               | Cell Signaling Technology #9427    | 1:200           |
| CREB Ser133                               | Cell Signaling Technology #9198    | 1:100           |
| Cyclin B1                                 | Cell Signaling Technology #4135    | 1:200           |
| E-Cadherin                                | Cell Signaling Technology #4065    | 1:100           |
| EGFR                                      | Cell Signaling Technology #2232    | 1:100           |
| EGFR Tyr1068                              | Cell Signaling Technology #2234    | 1:50            |
| EGFR Tyr1148                              | BioSource #44-792                  | 1:100           |
| EGFR Tyr1173                              | BioSource #44-794                  | 1:100           |
| Elk1 Ser383                               | Cell Signaling Technology #9181    | 1:100           |
| ErbB2 Tyr1248                             | Cell Signaling Technology #2247    | 1:100           |
| ErbB3 Tyr1289                             | Cell Signaling Technology #4791    | 1:200           |
| ERK Thr202/Tyr204                         | Cell Signaling Technology #9101    | 1:1000          |
| FAK Tyr576/Tyr577                         | Cell Signaling Technology #3281    | 1:200           |
| FKHR Ser256                               | Cell Signaling Technology #9461    | 1:100           |
| GSK3 $\alpha/\beta$ Ser21/Ser9            | Cell Signaling Technology #9331    | 1:100           |
| IGF1R Tyr1135/Tyr1136, IR Tyr1150/Tyr1151 | Cell Signaling Technology #3024    | 1:200           |
| IRS1 Ser612                               | Cell Signaling Technology #2386    | 1:200           |
| JNK Thr183/Tyr185                         | Cell Signaling Technology #9251    | 1:100           |
| LC3B                                      | Cell Signaling Technology #2775    | 1:100           |
| LIMK1/2 Thr508/Thr505                     | Cell Signaling Technology #3841    | 1:100           |
| LKB1 Ser334                               | Cell Signaling Technology #3055    | 1:50            |
| MDM2 Ser166                               | Cell Signaling Technology #3521    | 1:100           |
| MEK1/2 Ser217/Ser221                      | Cell Signaling Technology #9121    | 1:500           |
| Met Tyr1234/Tyr1235                       | Cell Signaling Technology #3126    | 1:200           |
| MGMT                                      | Cell Signaling Technology #2739    | 1:2000          |
| mTOR Ser2448                              | Cell Signaling Technology #2971    | 1:100           |
| Nf $\kappa$ B p65 Ser536                  | Cell Signaling Technology #3031    | 1:100           |
| p38 Thr180/Tyr182                         | Cell Signaling Technology #9211    | 1:100           |
| p53                                       | Cell Signaling Technology #9282    | 1:1000          |
| p70 S6 Kinase Thr412                      | Upstate #07-018                    | 1:500           |
| p90RSK Ser380                             | Cell Signaling Technology #9341    | 1:200           |
| PAK1/2 Ser199/Ser204/Ser192/Ser197        | Cell Signaling Technology #2605    | 1:50            |
| Paxillin Tyr118                           | Cell Signaling Technology #2541    | 1:500           |
| PDGFR $\alpha$ Tyr754                     | Cell Signaling Technology #2992    | 1:500           |
| PDGFR $\beta$ Tyr716                      | Upstate #07-021                    | 1:200           |

**Supplemental Table 2: Short Tandem Repeat (STR) profiling authenticates clones B, C, D, and E as of U87MG origin. While the Y allele of amelogenin was not matched, Y-chromosome painting and Q-band assay confirmed that the clones were male in origin.**

| % Match to HTB-14 | ATCC® Cat. No.                         | Designation                                                   | D5S818 | D13S317 | D7S820 | D16S539 | vWA   | THO1 | AMEL | TPOX | CSF1PO |
|-------------------|----------------------------------------|---------------------------------------------------------------|--------|---------|--------|---------|-------|------|------|------|--------|
| 100%              | HTB-14<br>(Reference Database Profile) | U-87 MG;<br>Glioblastoma-Astrocytoma;<br>Human (Homo sapiens) | 11,12  | 8,11    | 8,9    | 12      | 15,17 | 9.3  | X,Y  | 8    | 10,11  |
| 93%               | CLONE B                                | U87MG                                                         | 11,12  | 8,11    | 8,9    | 12      | 15,17 | 9.3  | X    | 8    | 10,11  |
| 93%               | CLONE C                                | U87MG                                                         | 11,12  | 8,11    | 8,9    | 12      | 15,17 | 9.3  | X    | 8    | 10,11  |
| 93%               | CLONE D                                | U87MG                                                         | 11,12  | 8,11    | 8,9    | 12      | 15,17 | 9.3  | X    | 8    | 10,11  |
| 93%               | CLONE E                                | U87MG                                                         | 11,12  | 8,11    | 8,9    | 12      | 15,17 | 9.3  | X    | 8    | 10,11  |
